# Supplementary material for: Novel Water-Based Paints for Composite Materials Used in Electromagnetic Shielding Applications
Source: MDPI journal article supplement (doi:10.3390/nano12030487), 2022-01-29
Supplement: s1 [file s1]

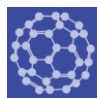

## Supplementary Information

# Novel Water-Based Paints for Composite Materials Used in Electromagnetic Shielding Applications

Ioan Valentin Tudose <sup>1,2,3</sup>, Kyriakos Mouratis <sup>1</sup>, Octavian Narcis Ionescu <sup>4,5</sup>, Cosmin Romanitan <sup>4</sup>, Cristina Pachiu <sup>4</sup>, Marian Popescu <sup>4</sup>, Volodymyr Khomenko <sup>6</sup>, Oksana Butenko <sup>6</sup>, Oksana Chernysh <sup>6</sup>, George Kenanakis <sup>3</sup>, Viacheslav Z. Barsukov <sup>6,\*</sup>, Mirela Petruta Sucheai <sup>1,4,\*</sup> and Emmanouel Koudoumas <sup>1,\*</sup>

- <sup>1</sup> Center of Materials Technology and Photonics, School of Engineering, Hellenic Mediterranean University, 71410 Heraklion, Crete, Greece; tudose\_valentin@yahoo.com (I.V.T.); kmouratis@hmu.gr (K.M.)
  - <sup>2</sup> Chemistry Department, University of Crete, 70013 Heraklion, Crete, Greece
  - <sup>3</sup> Institute of Electronic Structure and Laser, Foundation for Research & Technology-Hellas, 71110 Heraklion, Crete, Greece; gkenanak@iesl.forth.gr
  - <sup>4</sup> National Institute for Research and Development in Microtechnologies (IMT-Bucharest), 023573 Bucharest, Romania; onionescu@gmail.com (O.N.I.); cosmin.romanitan@imt.ro (C.R.); cristina.pachiu@imt.ro (C.P.); fluidproiect@gmail.com (M.P.)
  - <sup>5</sup> Petroleum and Gas University of Ploiesti, 100680 Ploiesti, Romania
  - <sup>6</sup> Department of Electrochemical Power Engineering and Chemistry, Kyiv National University of Technologies and Design, 01011 Kyiv, Ukraine; v.khomenko@i.ua (V.K.); keeh@kntud.edu.ua (O.B.); chernyshoksana14@gmail.com (O.C.)
- \* Correspondence: v-barsukov@i.ua (V.Z.B.); mirasucheai@hmu.gr or mira.sucheai@imt.ro (M.P.S.); koudoumas@hmu.gr (E.K.)

**Citation:** Tudose, I.V.; Mouratis, K.; Ionescu, O.N.; Romanitan, C.; Pachiu, C.; Popescu, M.; Khomenko, V.H.; Butenko, O.; Chernysh, O.; Kenanakis, G.; et al. Novel Water-Based Paints for Composite Materials Used in Electromagnetic Shielding Applications. *Nanomaterials* **2022**, *12*, 487. <https://doi.org/10.3390/nano12030487>

Academic Editor: Jin Suk Chung

Received: 28 December 2021

Accepted: 21 January 2022

Published: 29 January 2022

**Publisher's Note:** MDPI stays neutral with regard to jurisdictional claims in published maps and institutional affiliations.

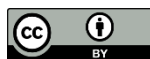

**Copyright:** © 2022 by the authors. Licensee MDPI, Basel, Switzerland. This article is an open access article distributed under the terms and conditions of the Creative Commons Attribution (CC BY) license (<https://creativecommons.org/licenses/by/4.0/>).

**Table S1.** The adherence of the best the improved HCl (A) and HBr (B) doped PANI/graphene/PDOT:PSS water based formulation paints to various substrates measured using method of evaluating tape adhesion of a coating system cross-cut Tape Test according to ASTM D 3359.

| Substrate material+<br>Version of paint | Applied paint                                                                       | After scraping                                                                      | Macroshot                                                                           | After<br>tearing off<br>the tape                                                     | Residuum at<br>the Scotch<br>tape                                                     | The<br>standart<br>ATSM D<br>3359 – 02* |
|-----------------------------------------|-------------------------------------------------------------------------------------|-------------------------------------------------------------------------------------|-------------------------------------------------------------------------------------|--------------------------------------------------------------------------------------|---------------------------------------------------------------------------------------|-----------------------------------------|
| Glass + A                               |    |    |    |    |    | 5B<br>0 %<br>None                       |
| Glass +B                                |   |   |  |   |   | 4B<br>Less than<br>5 %                  |
| Glass +Base                             |  |  |  |  |  | 3B<br>5-15 %                            |

Plexiglass+ A

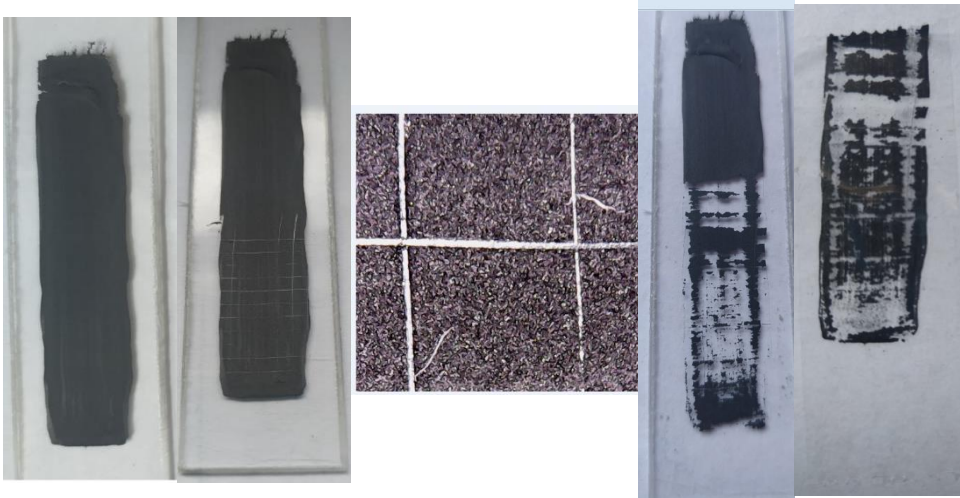

0B  
Greater than 65 %

Plexiglass+B

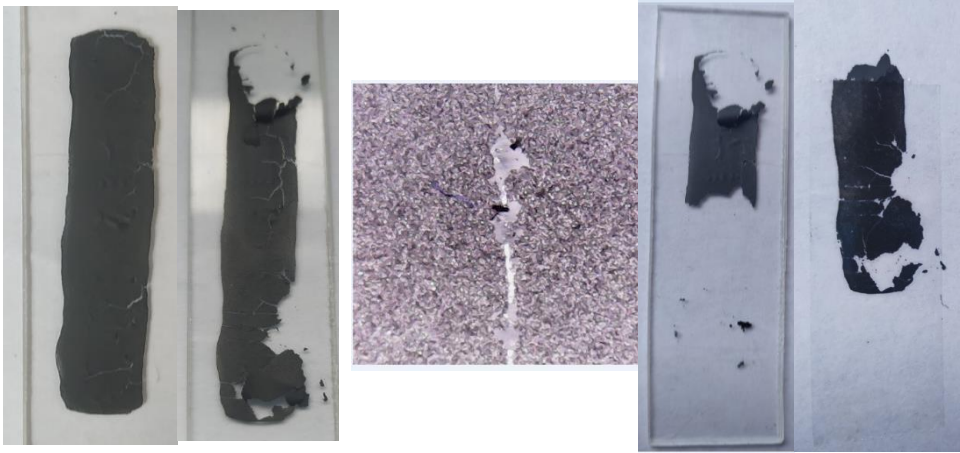

0B  
Greater than 65 %

Plexiglass+Base

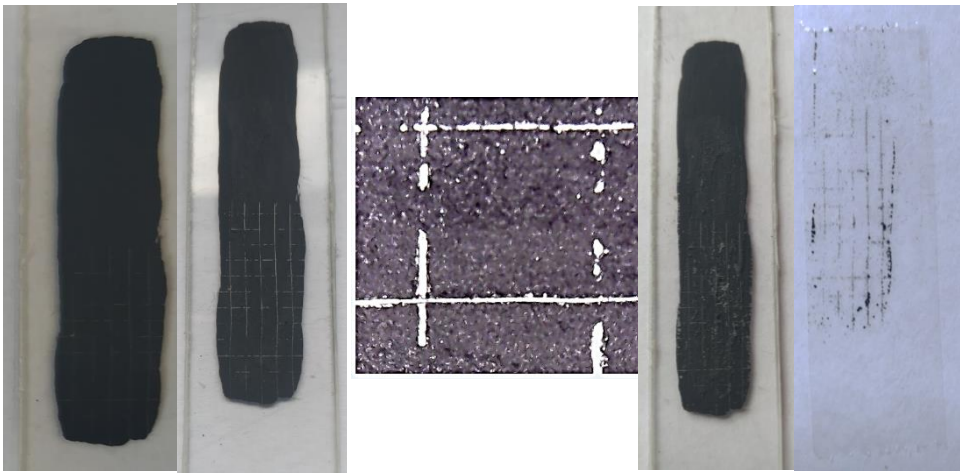

4B  
Less than 5 %

|          |                                                                                     |                                                                                     |                                                                                     |                                                                                      |                                                                                       |                         |
|----------|-------------------------------------------------------------------------------------|-------------------------------------------------------------------------------------|-------------------------------------------------------------------------------------|--------------------------------------------------------------------------------------|---------------------------------------------------------------------------------------|-------------------------|
| PET + A  |    |    |    |    |    | 0B<br>Greater than 65 % |
| PET +B   |   |   |                                                                                     |   |   | 0B<br>Greater than 65 % |
| PET+Base |  |  |  |  |  | 4B<br>Less than 5 %     |



PBT (the case of dosimeter+A

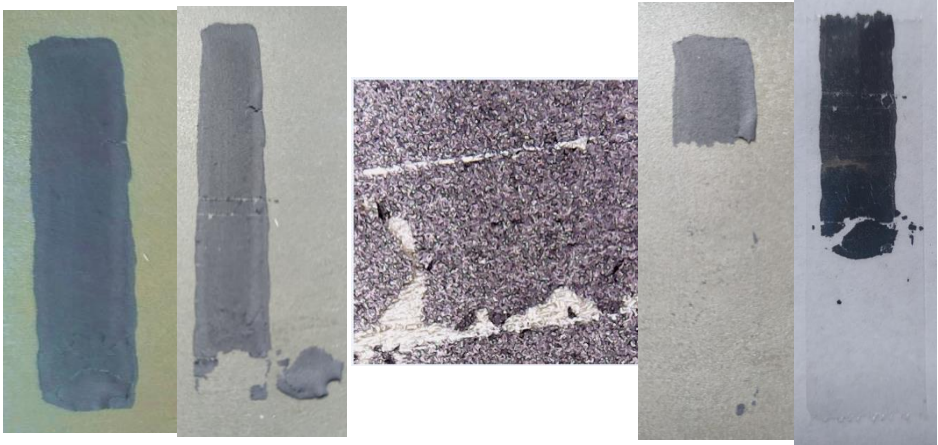

0B  
Greater than 65 %

PBT (the case of dosimeter} + B

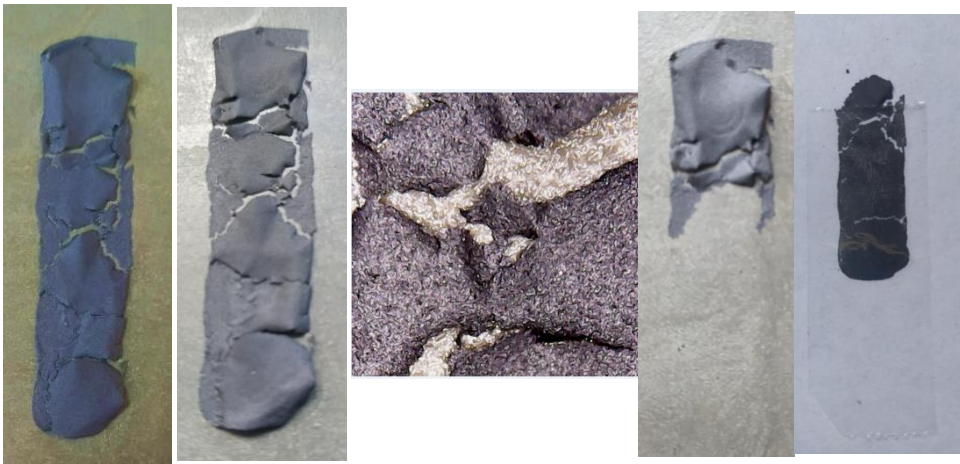

0B  
Greater than 65 %

PBT (the case of dosimeter) + Base

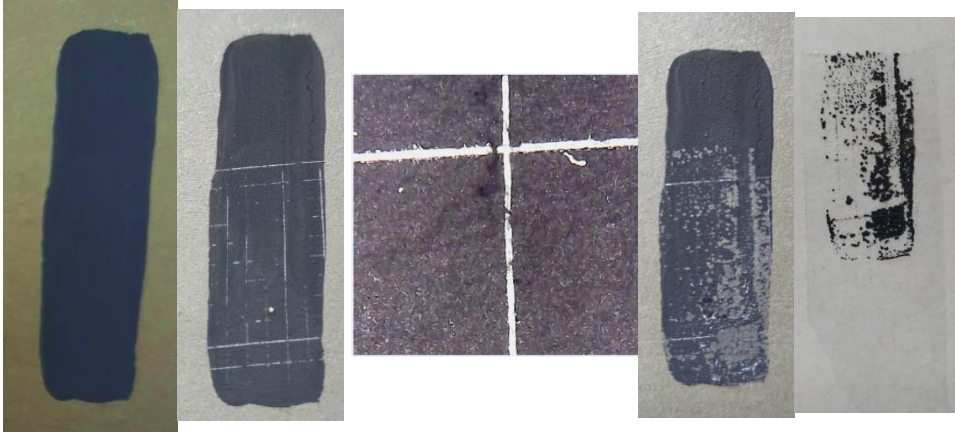

1B  
35-65 %

|                                               |                                                                                     |                                                                                     |                                                                                      |                         |
|-----------------------------------------------|-------------------------------------------------------------------------------------|-------------------------------------------------------------------------------------|--------------------------------------------------------------------------------------|-------------------------|
| Polyacetal (the case of termal imager) + A    |    |    |    | 0B<br>Greater than 65 % |
| Polyacetal (the case of termal imager) + B    |   |   |   | 0B<br>Greater than 65 % |
| Polyacetal (the case of termal imager) + Base |  |  |  | 4B<br>Less than 5 %     |
| Caprolone+A                                   |  |  |  | 5B<br>0 %<br>None       |



|                  |                                                                                     |                                                                                     |                                                                                      |                                          |
|------------------|-------------------------------------------------------------------------------------|-------------------------------------------------------------------------------------|--------------------------------------------------------------------------------------|------------------------------------------|
| Caprolone + B    | 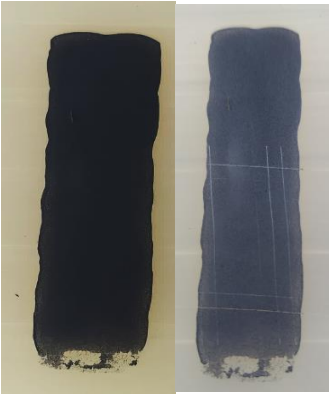   |    |    | 5B<br>0 %<br>None                        |
| Caprolone + Base |   |   |   | 4-5B<br>0 %<br>None,<br>Less than<br>5 % |
| Concrete+A       |  |  |  | Exfoliate a thin top layer               |
| Concrete+B       |  |  |  | Exfoliate a thin top layer               |

|                 |                                                                                     |                                                                                     |                                                                                      |                                       |
|-----------------|-------------------------------------------------------------------------------------|-------------------------------------------------------------------------------------|--------------------------------------------------------------------------------------|---------------------------------------|
| Concrete+ Base  | 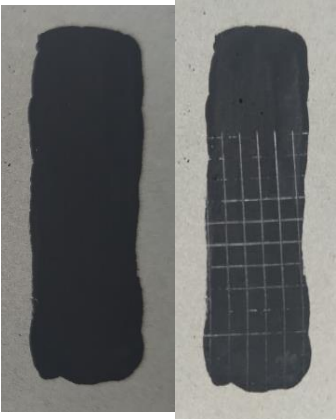   |    |    | 2B 15-35 %                            |
| Cardboard+A     |   |   |   | 0 %<br>None,<br>4-5B Less than<br>5 % |
| Cardboard+ B    |  |  |  | 0 %<br>None,<br>4-5B Less than<br>5 % |
| Cardboard+ Base |  |  |  | 3B 5-15 %                             |



|            |                                                                                     |                                                                                     |                                                                                      |                        |
|------------|-------------------------------------------------------------------------------------|-------------------------------------------------------------------------------------|--------------------------------------------------------------------------------------|------------------------|
| Tile+A     |    |    |    | 4B<br>Less than<br>5 % |
| Tile+ B    |   |   |   | 5B<br>0 %<br>None      |
| Tile+ Base |  |  |  | 3B<br>5-15%            |

\*Legend: Classification of Adhesion Test Results for Test Method.

| CLASSIFICATION OF ADHESION TEST RESULTS |                      |                                                                                                                     |
|-----------------------------------------|----------------------|---------------------------------------------------------------------------------------------------------------------|
| CLASSIFICATION                          | PERCENT AREA REMOVED | SURFACE OF CROSS-CUT AREA FROM WHICH<br>FLAKING HAS OCCURRED FOR SIX PARALLEL CUTS<br>AND ADHESION RANGE BY PERCENT |
| 5B                                      | 0 % None             | 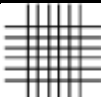                               |
| 4B                                      | Less than 5 %        |                                |

|    |                   |                                                                                     |                                                                                     |
|----|-------------------|-------------------------------------------------------------------------------------|-------------------------------------------------------------------------------------|
| 3B | 5-15 %            | 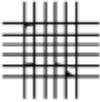 |  |
| 2B | 15-35 %           |  |  |
| 1B | 35-65 %           |  |  |
| 0B | Greater than 65 % |  |                                                                                     |
